# Supplementary material
Source: PubMed Central journal article supplement (PMC3253010)

Figure S1

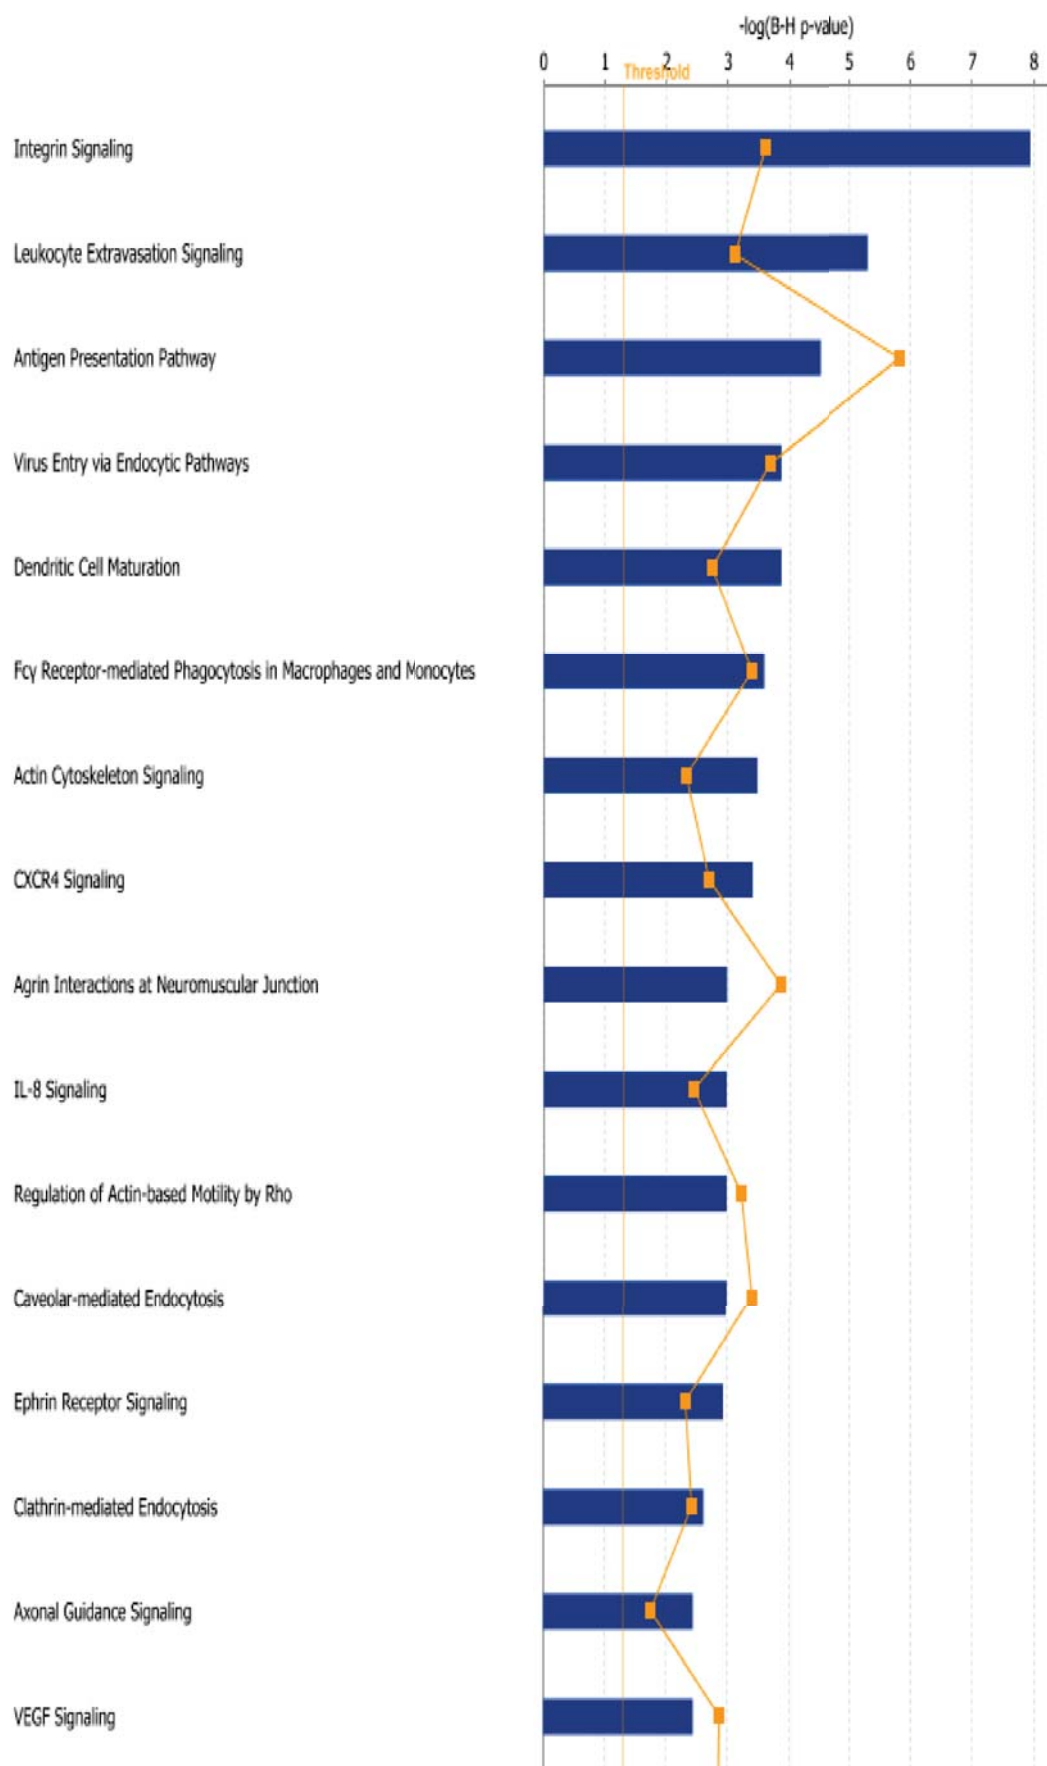

Supplement: supp_japplphysiol.00634.2010_figS1.pdf [file supp_japplphysiol.00634.2010_figS1.pdf]

Fig S2a

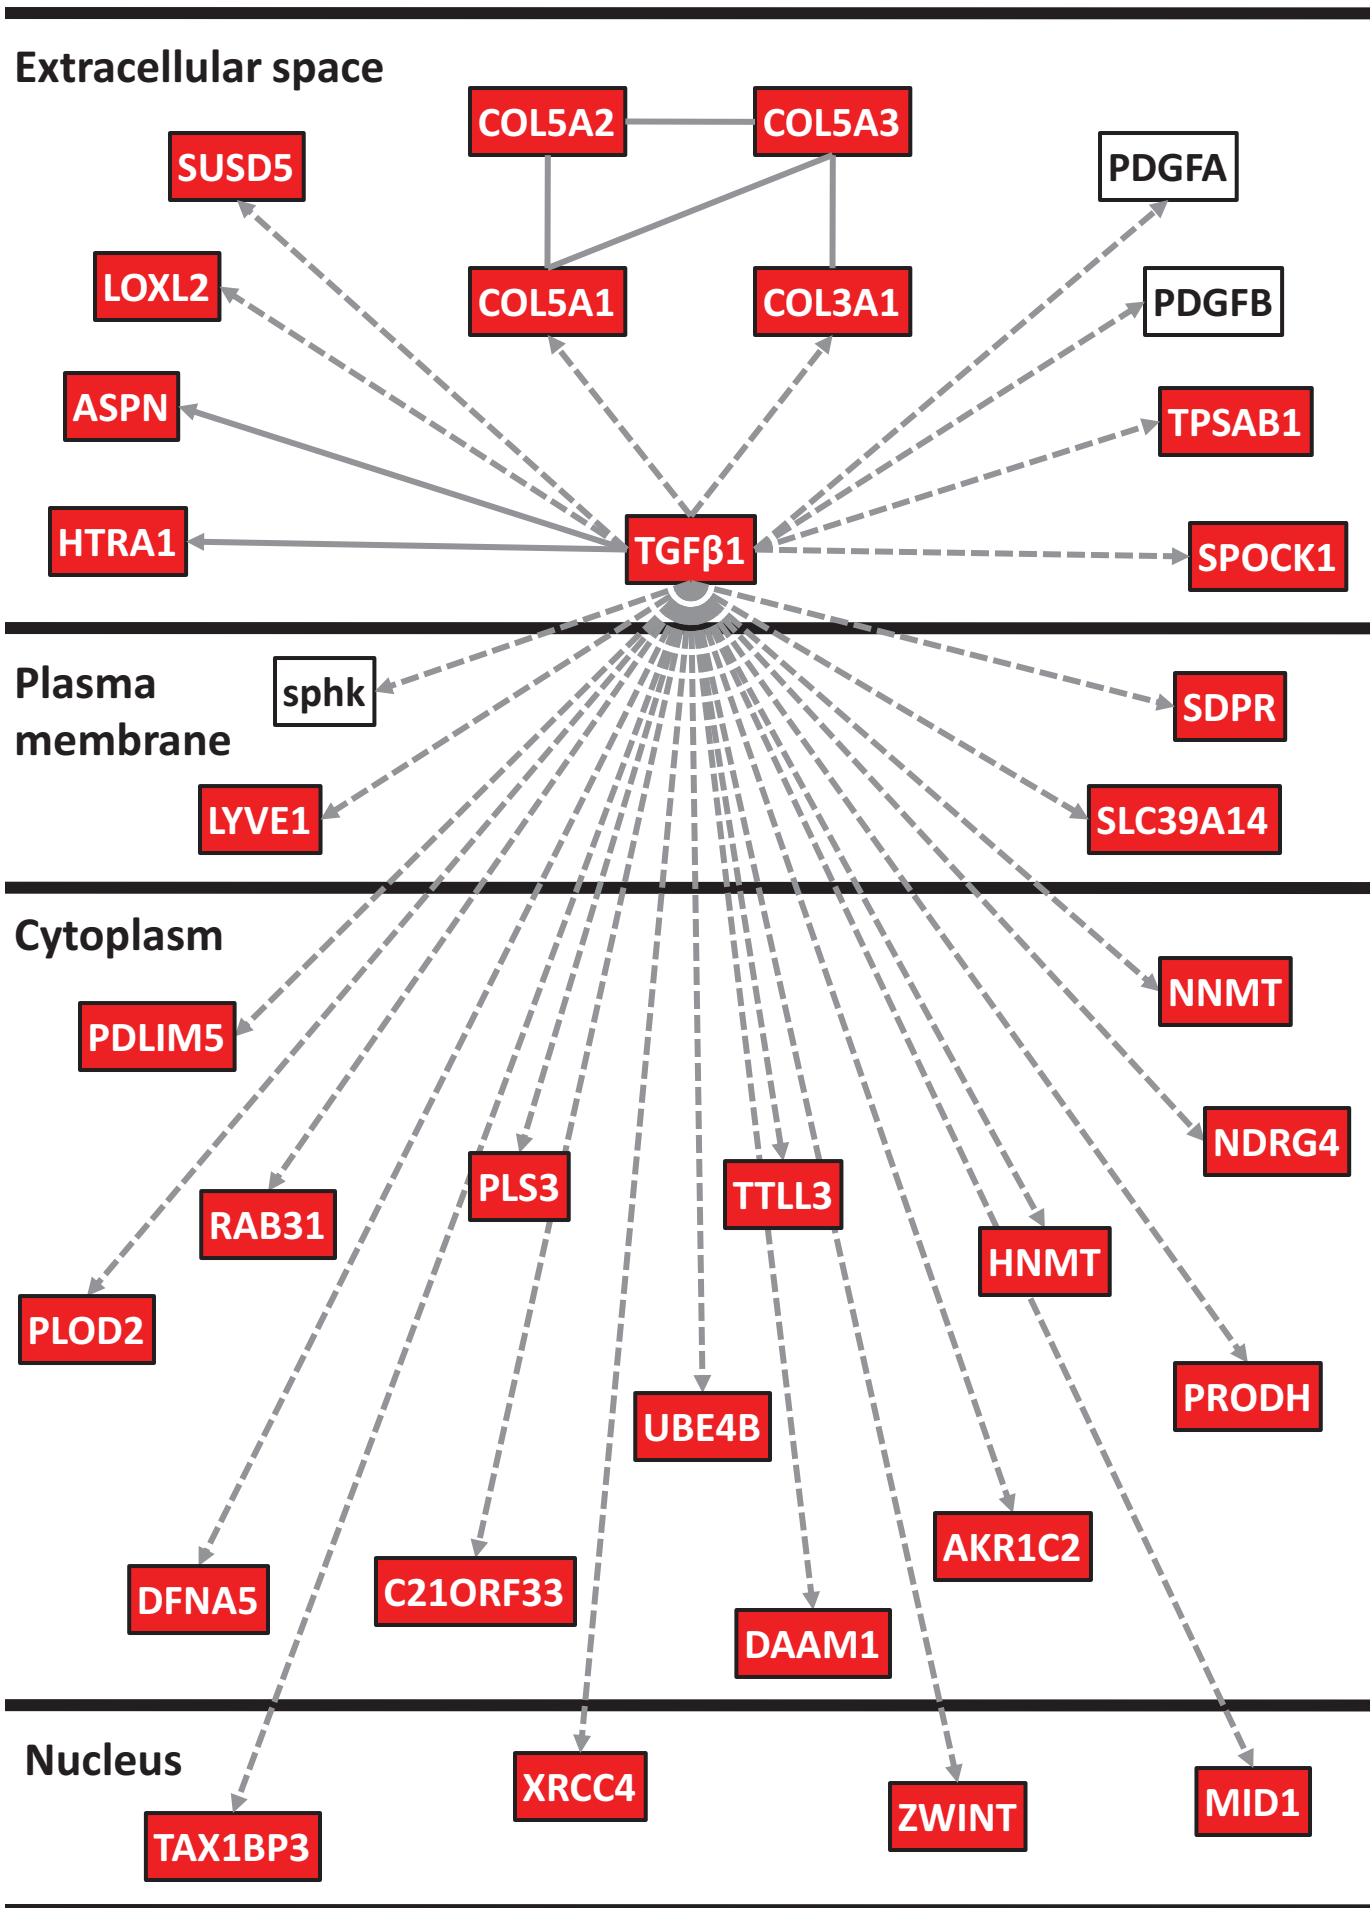

Supplement: supp_japplphysiol.00634.2010_figS2a.pdf [file supp_japplphysiol.00634.2010_figS2a.pdf]

Fig S2b

Extracellular space

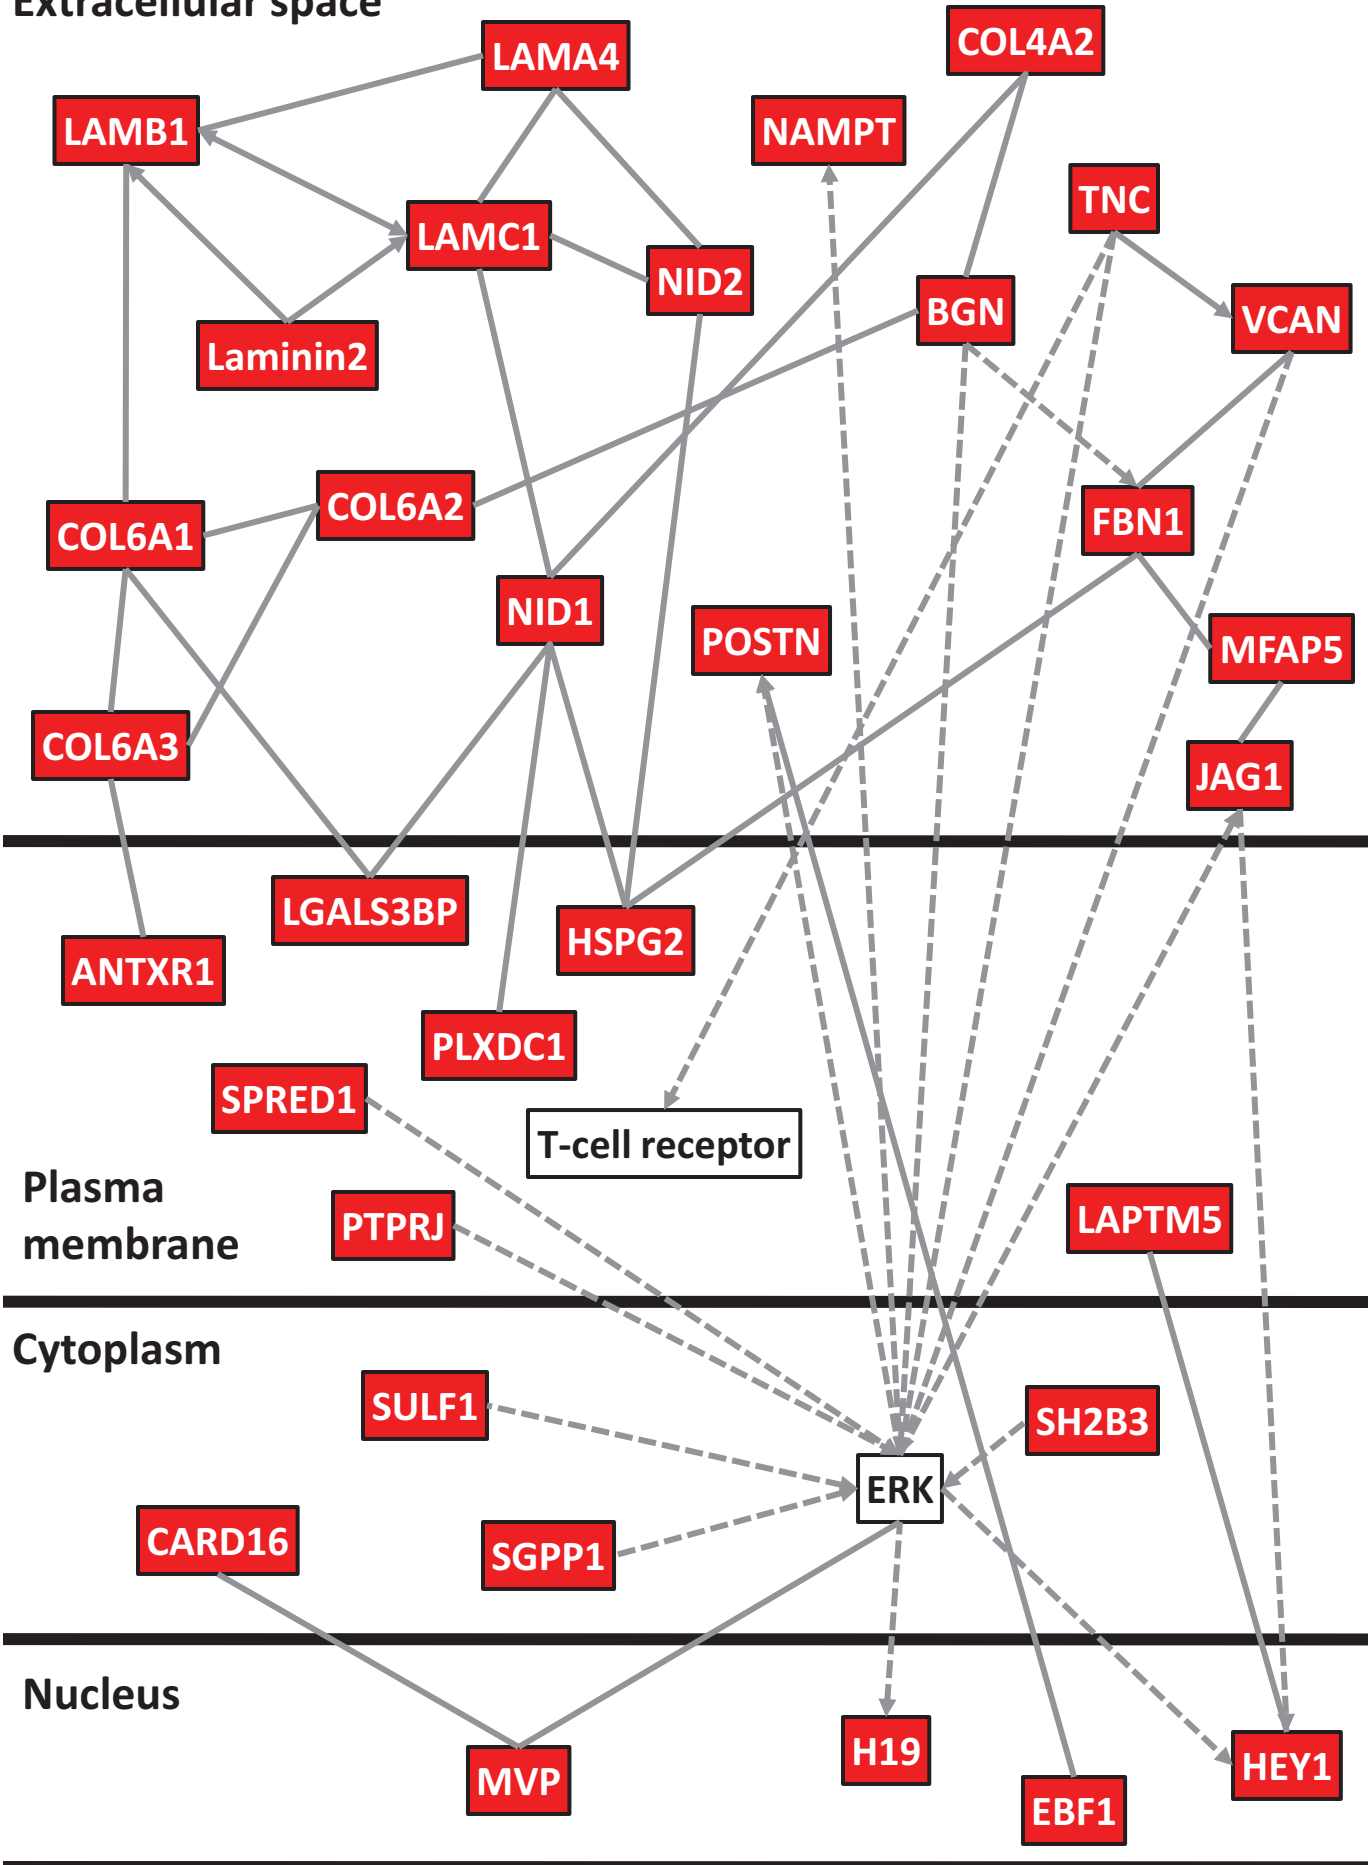

Supplement: supp_japplphysiol.00634.2010_figS2b.pdf [file supp_japplphysiol.00634.2010_figS2b.pdf]

Fig S2c

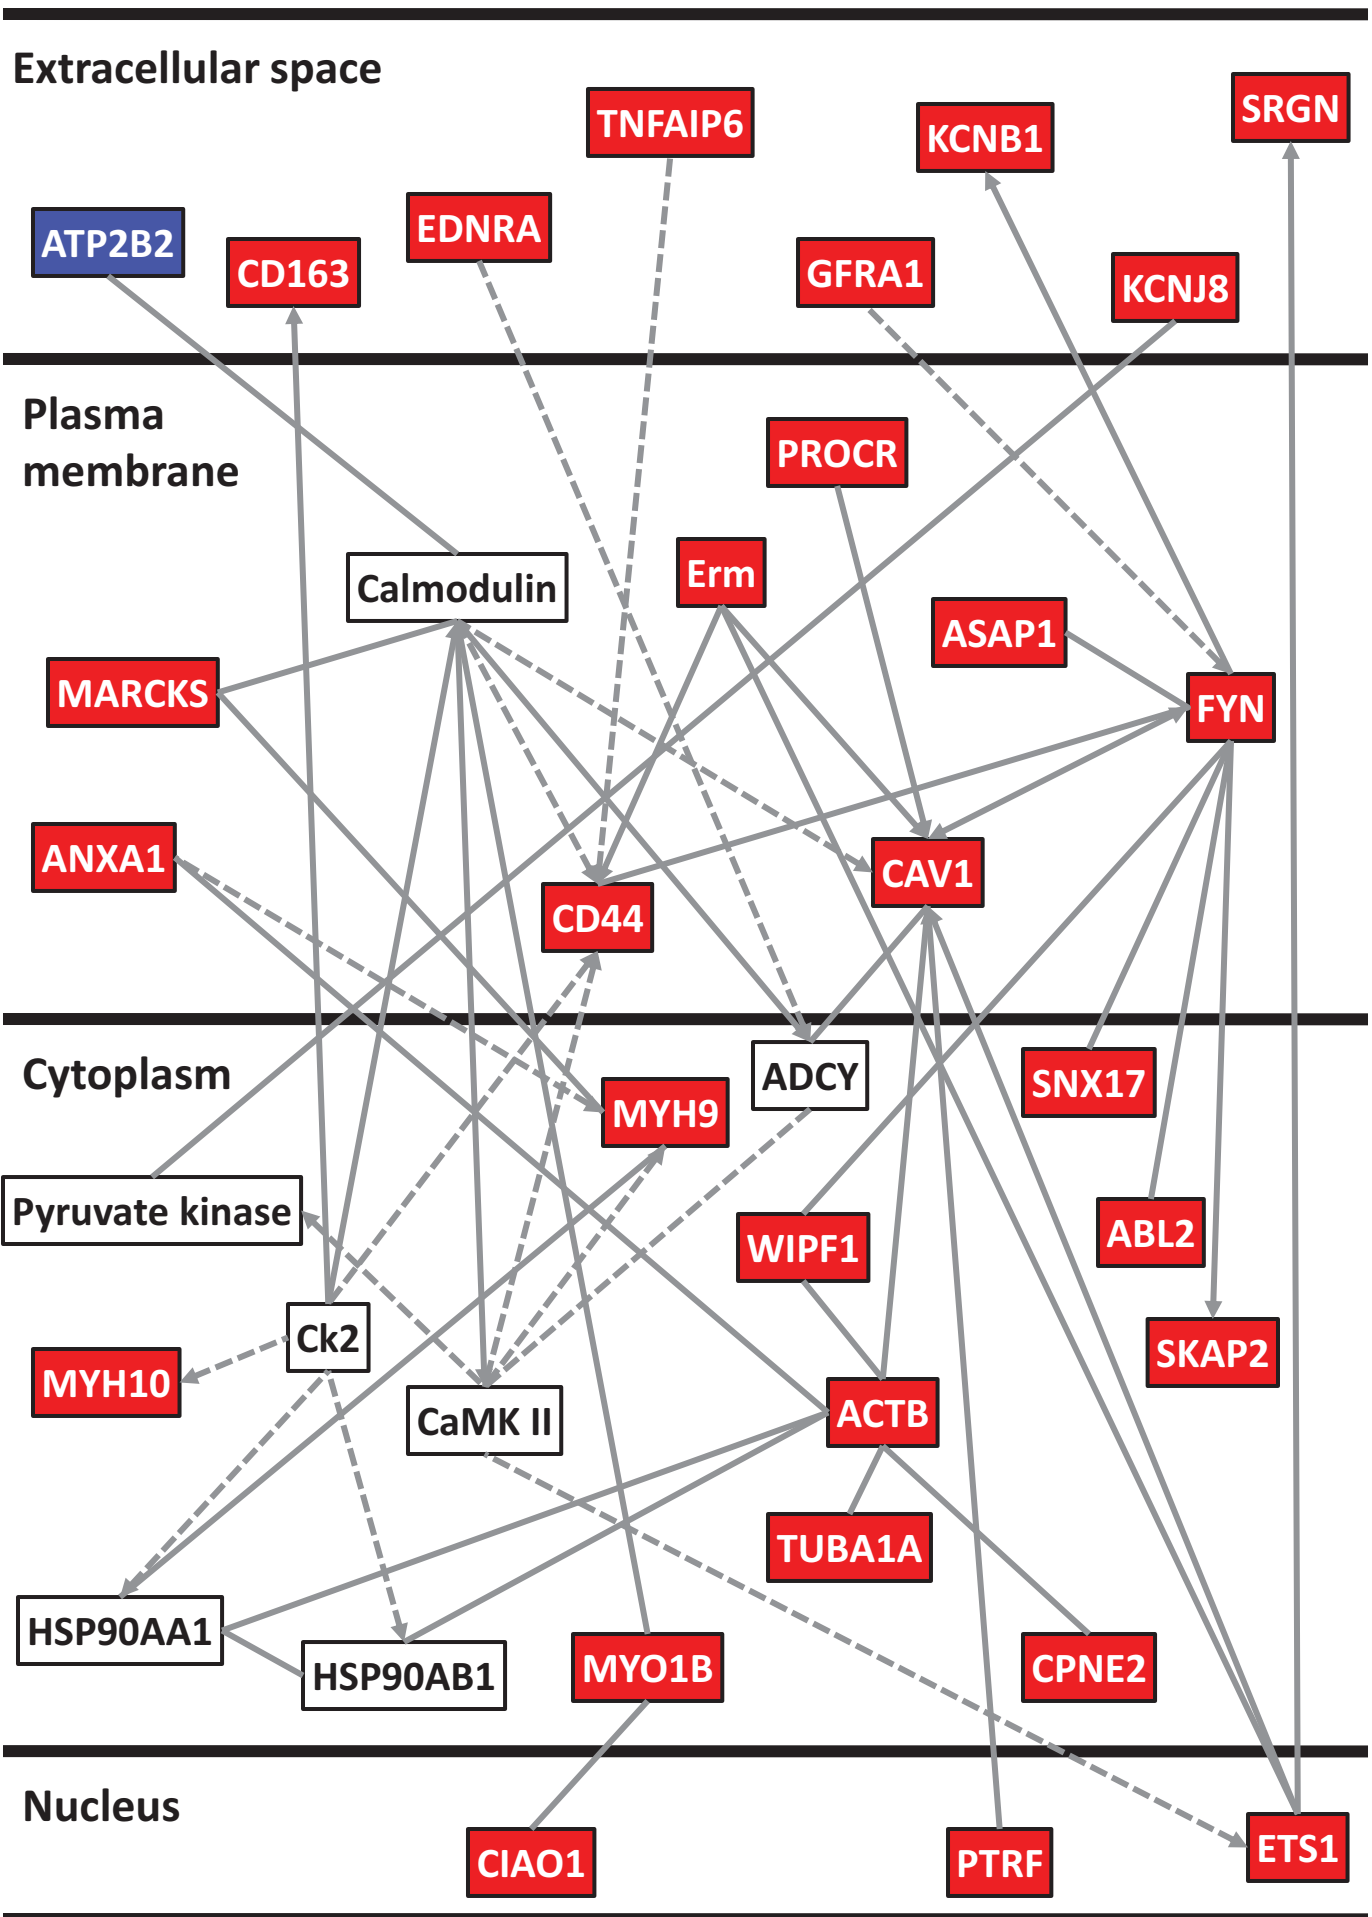

Supplement: supp_japplphysiol.00634.2010_figS2c.pdf [file supp_japplphysiol.00634.2010_figS2c.pdf]

Fig S3

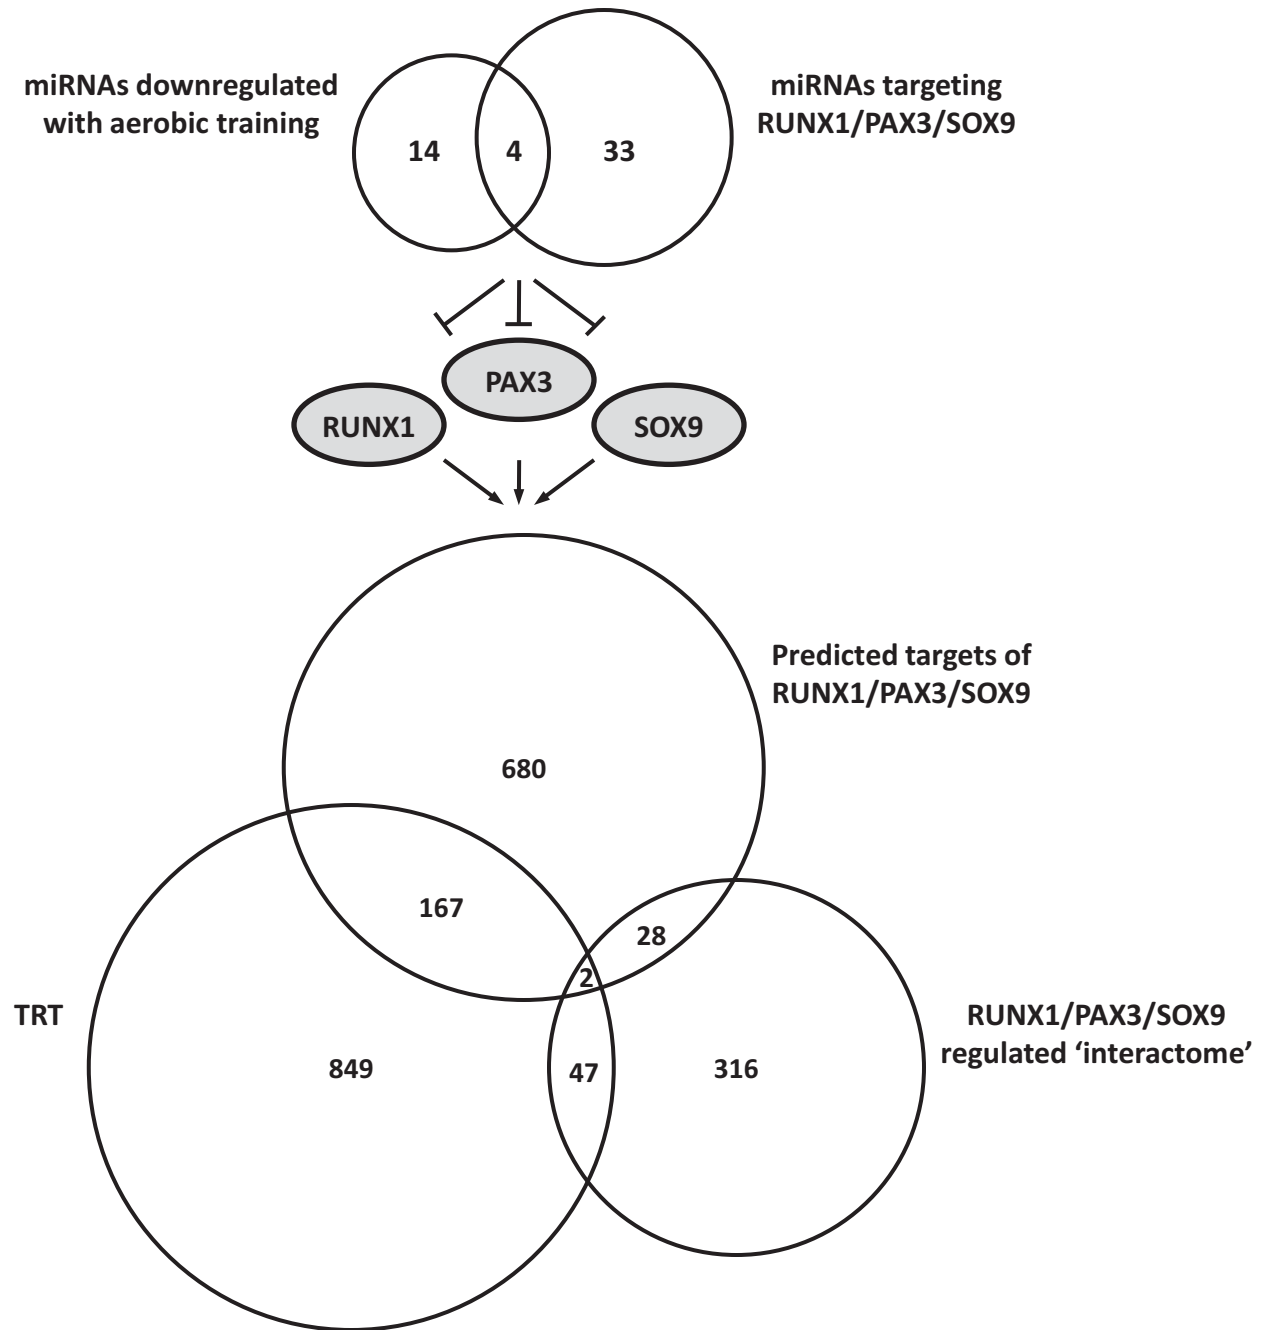

Supplement: supp_japplphysiol.00634.2010_figS3.pdf [file supp_japplphysiol.00634.2010_figS3.pdf]

Fig S4

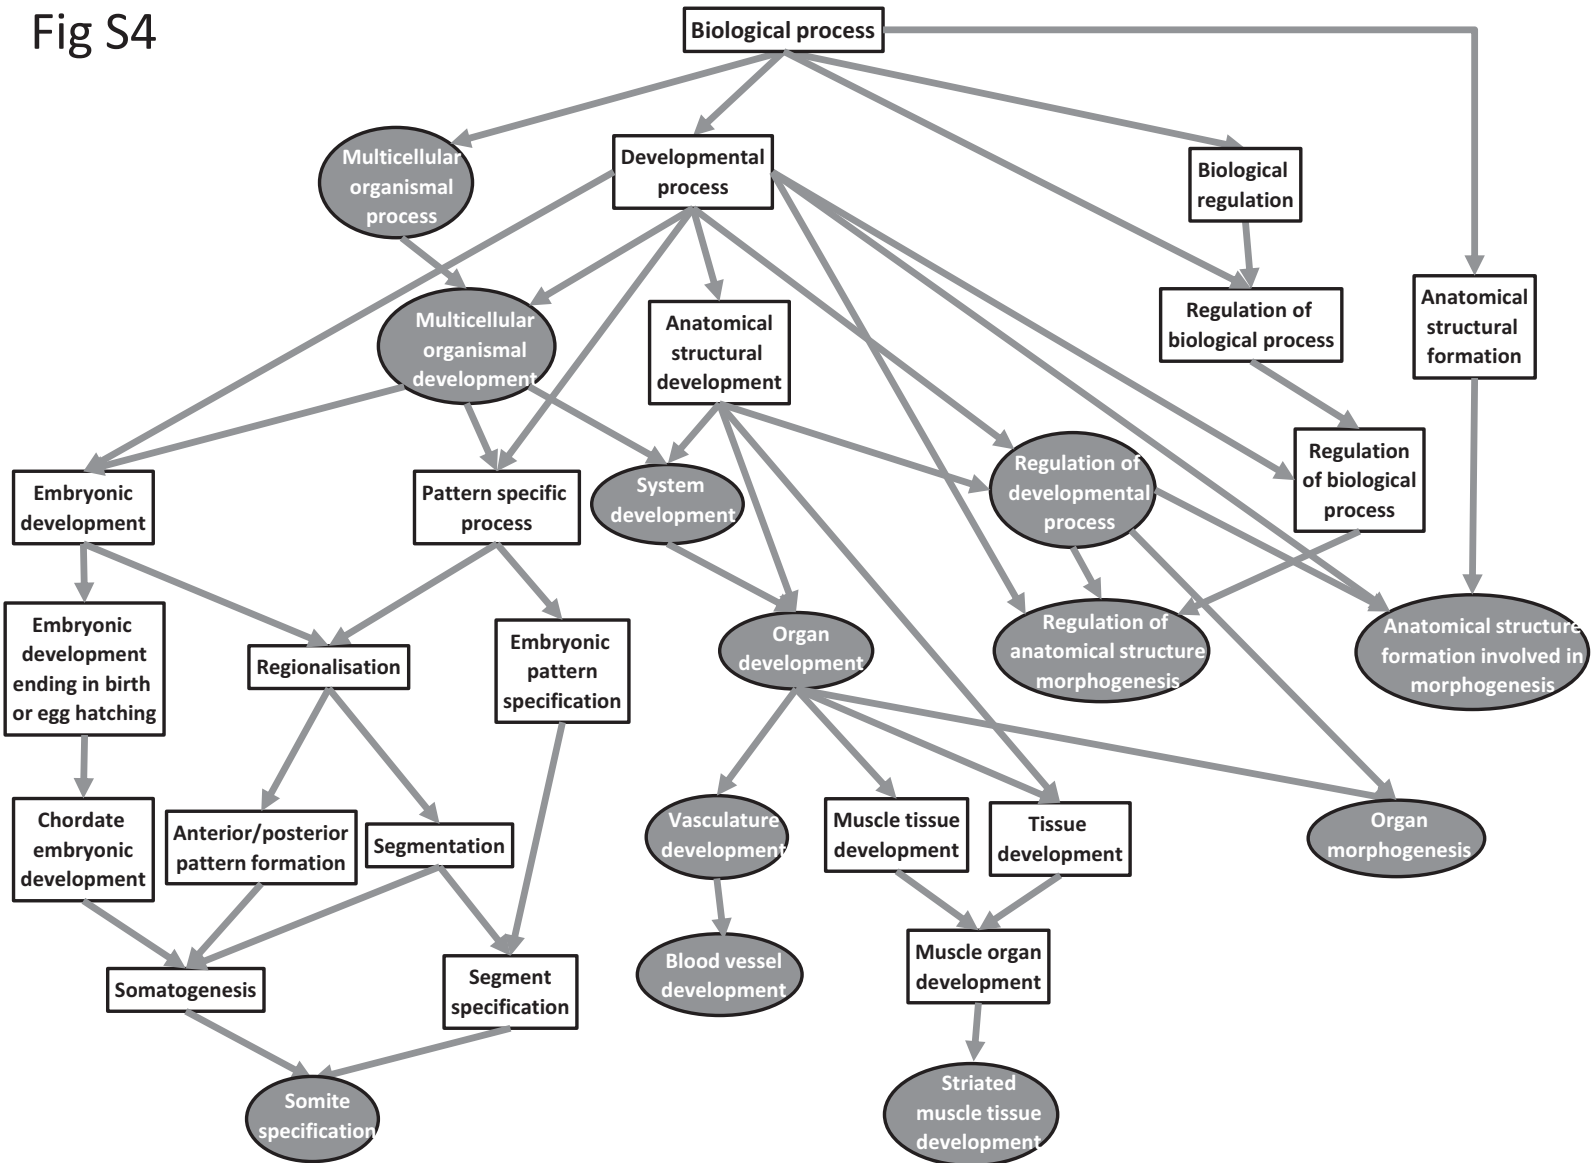

Supplement: supp_japplphysiol.00634.2010_figS4.pdf [file supp_japplphysiol.00634.2010_figS4.pdf]

Fig S5

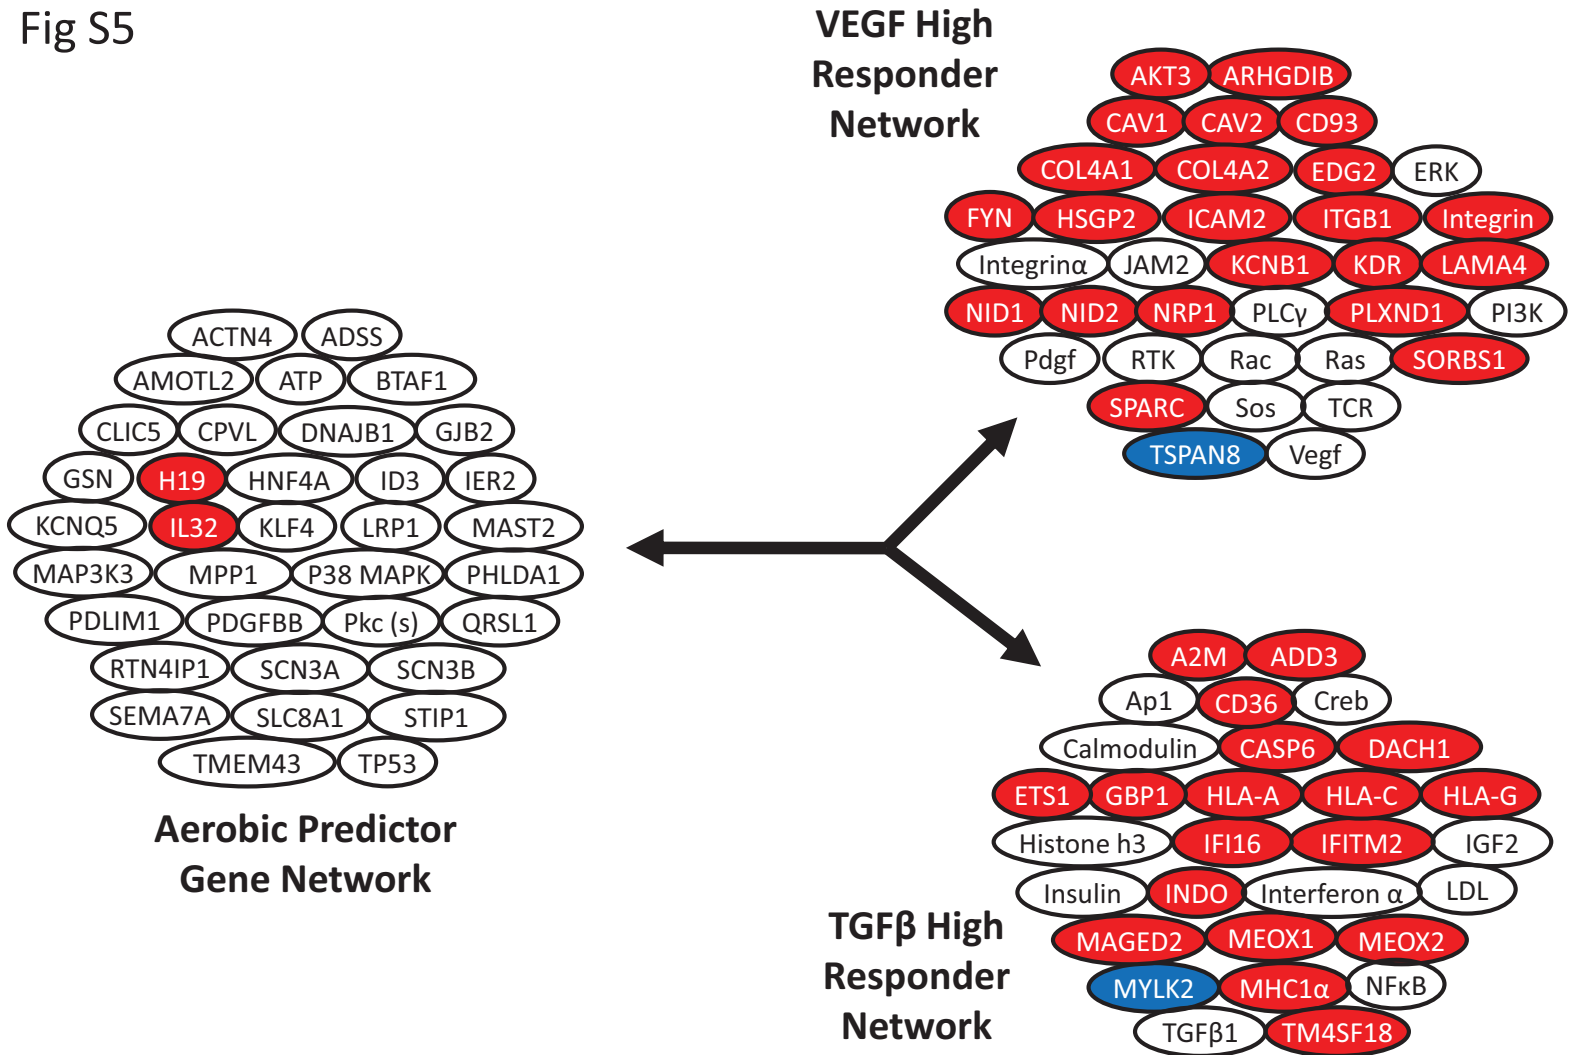

Supplement: supp_japplphysiol.00634.2010_figS5.pdf [file supp_japplphysiol.00634.2010_figS5.pdf]
